# Supplementary material for: AI-based detection of contrast-enhancing MRI lesions in patients with multiple sclerosis
Source: Springer Nature journal article supplement (doi:10.1186/s13244-023-01460-3), 2023-07-16
Supplement: 13244_2023_1460_MOESM1_ESM.pdf [file 13244_2023_1460_MOESM1_ESM.pdf]

## AI-based detection of contrast-enhancing MRI lesions in patients with multiple sclerosis

### ELECTRONIC SUPPLEMENTARY MATERIAL

**Table SM1:** Results of the patient-level analysis. Confusion matrix reader 1 versus AI tool for the classification as CE(+) patient or CE(-) patient.

|                              | <b>Reader 1:<br/>CE(+) patient</b> | <b>Reader 1:<br/>CE(-) patient</b> |     |
|------------------------------|------------------------------------|------------------------------------|-----|
| <b>AI:<br/>CE(+) patient</b> | 41                                 | 6                                  | 47  |
| <b>AI:<br/>CE(-) patient</b> | 25                                 | 432                                | 457 |
|                              | 66                                 | 438                                | 504 |

AI, artificial intelligence; CE, contrast-enhancing; CE(+), patient with at least one CE lesion; CE(-), patient with no CE lesion.

**Table SM2:** Results of the patient-level analysis. Confusion matrix reader 2 versus AI tool for the classification as CE(+) patient or CE(-) patient.

|                              | <b>Reader 2:<br/>CE(+) patient</b> | <b>Reader 2:<br/>CE(-) patient</b> |     |
|------------------------------|------------------------------------|------------------------------------|-----|
| <b>AI:<br/>CE(+) patient</b> | 43                                 | 4                                  | 47  |
| <b>AI:<br/>CE(-) patient</b> | 14                                 | 443                                | 457 |
|                              | 57                                 | 447                                | 504 |

AI, artificial intelligence; CE, contrast-enhancing; CE(+), patient with at least one CE lesion; CE(-), patient with no CE lesion.

**Table SM3:** Results of the patient-level analysis. Confusion matrix reader 1 versus reader 2 for the classification as CE(+) patient or CE(-) patient.

|                            | Reader 1:<br>CE(+) patient | Reader 1:<br>CE(-) patient |     |
|----------------------------|----------------------------|----------------------------|-----|
| Reader 2:<br>CE(+) patient | 50                         | 7                          | 57  |
| Reader 2:<br>CE(-) patient | 16                         | 431                        | 447 |
|                            | 66                         | 438                        | 504 |

CE, contrast-enhancing; CE(+), patient with at least one CE lesion; CE(-), patient with no CE lesion.

**Table SM4:** Additional results of the lesion-level analysis. Only supratentorial lesions from Table 3 in the manuscript were included. The lobe location was not significantly different between true positive and false negative CE lesions. Statistical significance was evaluated using the Pearson's chi-squared test, with  $p < 0.05$  as threshold for statistical significance.

|      |           | True positive<br>CE lesions<br>(n = 36) | False negative<br>CE lesions<br>(n = 35) | p-value |
|------|-----------|-----------------------------------------|------------------------------------------|---------|
| Lobe | Frontal   | 20                                      | 20                                       | 0.596   |
|      | Parietal  | 9                                       | 5                                        |         |
|      | Temporal  | 2                                       | 4                                        |         |
|      | Occipital | 5                                       | 6                                        |         |

CE, contrast-enhancing.
